# Supplementary material for: Microbial diversity and mineral composition of weathered serpentine rock of the Khalilovsky massif
Source: PLOS journal article supplement (doi:10.1371/journal.pone.0225929), 2019-12-12
Supplement: S5 (10.1371/journal.pone.0225929.s005) [file journal.pone.0225929.s005]

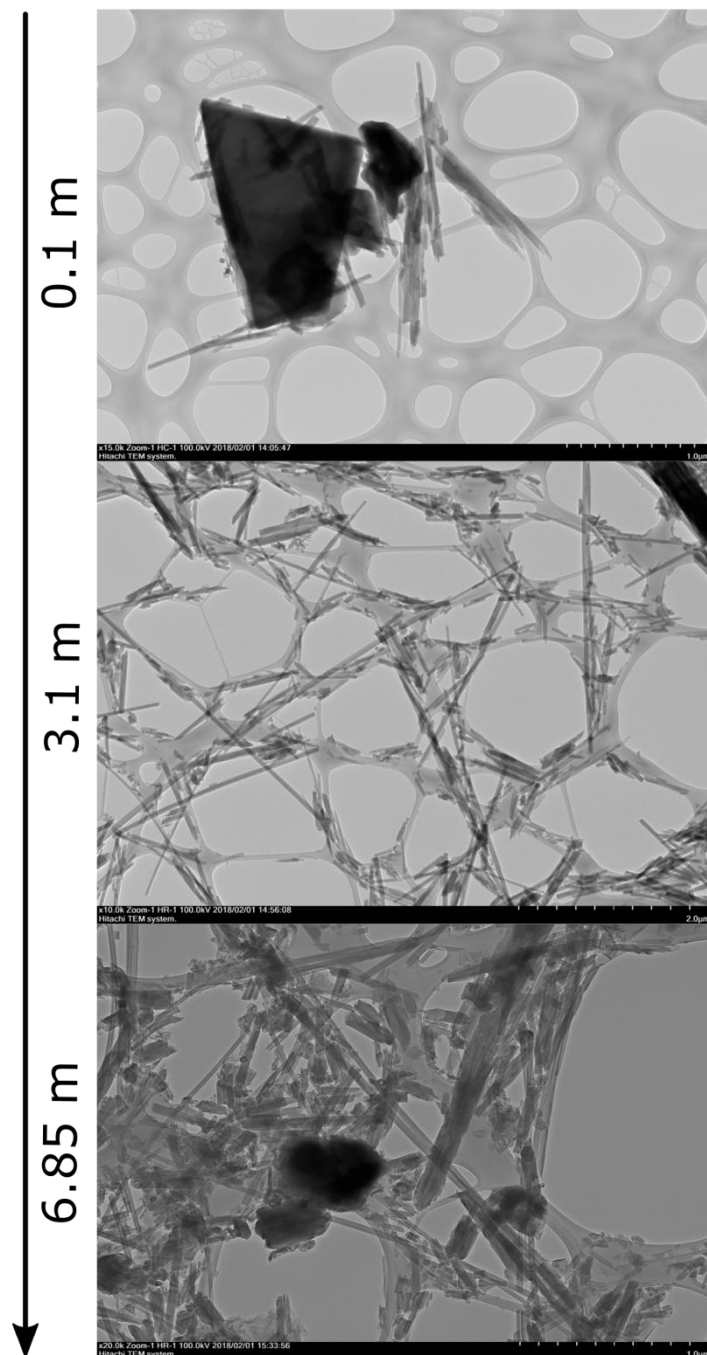

**S4 Fig.** Transmission electron micrographs (TEM) of serpentinites collected at (A) 0.1 m, (B) 3.1 m and (C) 6.85 m in a depth.
